# Supplementary material for: The effect of host size on binding in host–guest complexes of cyclodextrins and polyoxometalates
Source: Royal Society of Chemistry journal article supplement (doi:10.1039/d4sc01061b), 2024-01-01
Supplement: d4sc01061b1.pdf [file d4sc01061b1.pdf]

**Supplementary Information for:**

**The Effect of Host Size on Binding in Host-Guest Complexes of Cyclodextrins and  
Polyoxometalates**

Pei Su<sup>\*,1,2</sup>, Xiao Zhu<sup>1,3</sup>, Solita M. Wilson<sup>1</sup>, Yuanning Feng<sup>2,4</sup>, Hugo Y. Samayoa-Oviedo,<sup>1</sup>  
Christian Sonnendecker<sup>5</sup>, Andrew J. Smith<sup>1</sup>, Wolfgang Zimmermann<sup>5</sup>, Julia Laskin<sup>\*,1</sup>

<sup>1</sup>*Department of Chemistry, Purdue University, 560 Oval Drive, West Lafayette, Indiana 47907, United States*

<sup>2</sup>*Department of Chemistry, Northwestern University, 2145 Sheridan Road, Evanston, Illinois 60208, United States*

<sup>3</sup>*Purdue University (ITAP), West Lafayette, Indiana 47907, United States*

<sup>4</sup>*Department of Chemistry and Biochemistry, The University of Oklahoma, 101 Stephenson Parkway, Norman, Oklahoma 73019, United States*

<sup>5</sup>*Institute of Analytical Chemistry, Universität Leipzig, Johannisallee 29, Leipzig 04103, Germany*

## Experimental Details for Theoretical Calculations

### ▪ Collision Cross Section (CCS) Calculations

For CCS calculations, we used the structures at the end of each cooling cycle at 393 K to represent different energy minima structures. These structures were subjected to CCS calculations in IMoS 1.10 using Trajectory Method (TM) that includes the ion-induced dipole potential between the partial charges and collision gas molecules, and the Lennard-Jones (L-J) neutral interaction potentials. We adopted the recommended Van der Waals radii of the atoms in IMoS calculations. Partial charges of WPOM were obtained from the previously reported structure obtained using Density Functional Theory calculations.<sup>1</sup> Partial charges of CDs were obtained from AMBER-compatible GLYCAM-06j force field.<sup>2</sup>

Initial L-J interaction potential ( $\epsilon$  and  $\sigma$ ) parameters in the calculations were obtained from Campuzano and Bush *et al.*<sup>3</sup> L-J parameters were further optimized<sup>4</sup> for oxygen atoms to account for the cooccurring charge and neutral potentials when oxygen atoms interact with collision gas molecules in the calculations. We used a structure of the  $\beta$ -CD–WPOM complex to find the optimal L-J parameters for oxygen due to its singular and well-defined binding mode with WPOM, which serves as a good standard for the series of complexes. Figure S2 shows a representative structure of the  $\beta$ -CD–WPOM complex obtained from MD simulations, in which the secondary face of  $\beta$ -CD binds to WPOM. We calculated the theoretical CCS of this structure using a set of L-J parameters ( $1.2 \leq \epsilon/\text{meV} \leq 2.5$ ,  $1 \leq \sigma/\text{\AA} \leq 4$ ) and compared them with the averaged experimentally determined CCS ( $436.2 \text{ \AA}^2$ ). A surface plot was generated showing the deviation of the theoretical prediction from the experiment for different L-J parameter combinations. Aside from a few valleys on the mapped optimization surface observed at extreme  $\epsilon$  and  $\sigma$  values, we found (Figure S12) a valley in the middle of the surface that converges at  $\epsilon = 2.2 \text{ meV}$  and  $\sigma = 2.5 \text{ \AA}$  with a 0.3% deviation from the experimental CCS. Therefore,  $\epsilon = 2.2 \text{ meV}$  and  $\sigma = 2.5 \text{ \AA}$  was employed for the subsequent CCS calculations.

Other specific parameters employed for CCS calculations of the complexes are as follows: N. Orientations: 3; N. Total Orientation: 300000; Timestep: 100; Reemission velocity: Elastic (mean); Gas: N<sub>2</sub>; Gas Radius: 1.5 Å; Pressure: 526.6 Pa; Temperature: 300 K; Polarization: 1.7 Å<sup>3</sup>; Trajectory method with Lennard Jones (LenJon) selected, and Ion Quadrupole (QPol) not selected.

**Table S1.** Average collision cross sections (CCSs) and errors of the CD-WPOM complexes shown in Figure 2b. Four CCS measurements performed on different days for each complex are listed in the table.

| Complex                             | Average CCS ( $\text{\AA}^2$ ) | Standard Deviation ( $\text{\AA}^2$ ) |
|-------------------------------------|--------------------------------|---------------------------------------|
| $\alpha$ -CD-WPOM                   | 428.0                          | 0.6                                   |
|                                     | 425.6                          | 1.4                                   |
|                                     | 428.5                          | 1.0                                   |
|                                     | 423.4                          | 1.3                                   |
| $\beta$ -CD-WPOM                    | 436.9                          | 1.5                                   |
|                                     | 435.7                          | 1.1                                   |
|                                     | 436.3                          | 1.0                                   |
|                                     | 435.8                          | 1.1                                   |
| $\gamma$ -CD-WPOM (smaller complex) | 459.2                          | 1.5                                   |
|                                     | 463.3                          | 1.0                                   |
|                                     | 462.5                          | 1.2                                   |
|                                     | 459.6                          | 0.4                                   |
| $\gamma$ -CD-WPOM (bigger complex)  | 472.1                          | 1.4                                   |
|                                     | 471.9                          | 0.5                                   |
|                                     | 474.7                          | 0.5                                   |
|                                     | 474.3                          | 0.2                                   |
| $\delta$ -CD-WPOM                   | 491.8                          | 1.4                                   |
|                                     | 486.3                          | 1.2                                   |
|                                     | 486.7                          | 1.0                                   |
|                                     | 488.5                          | 1.1                                   |
| $\epsilon$ -CD-WPOM                 | 504.2                          | 1.4                                   |
|                                     | 511.1                          | 0.4                                   |
|                                     | 507.6                          | 0.8                                   |
|                                     | 503.8                          | 0.9                                   |
| $\zeta$ -CD-WPOM                    | 500.7                          | 0.4                                   |
|                                     | 500.4                          | 1.1                                   |
|                                     | 499.5                          | 1.5                                   |
|                                     | 503.3                          | 0.9                                   |

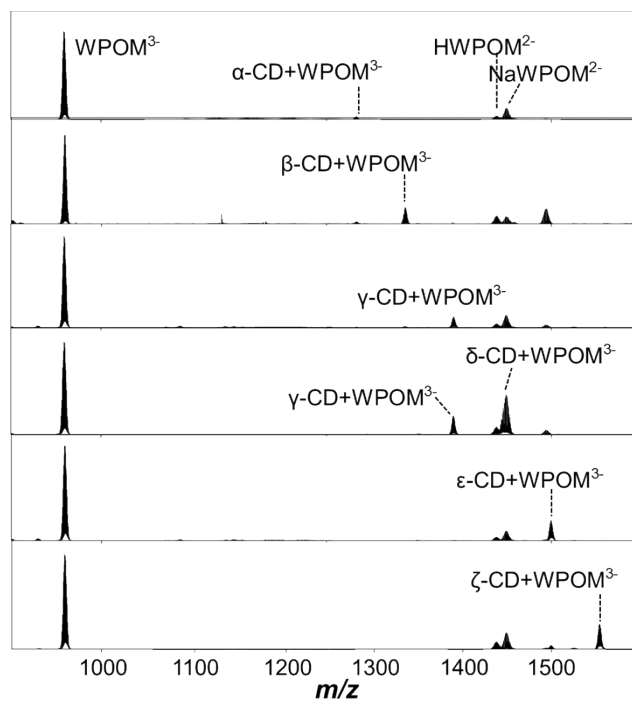

**Figure S1.** ESI-MS spectra of CD–WPOM complexes in the  $m/z$  100–3000 range.

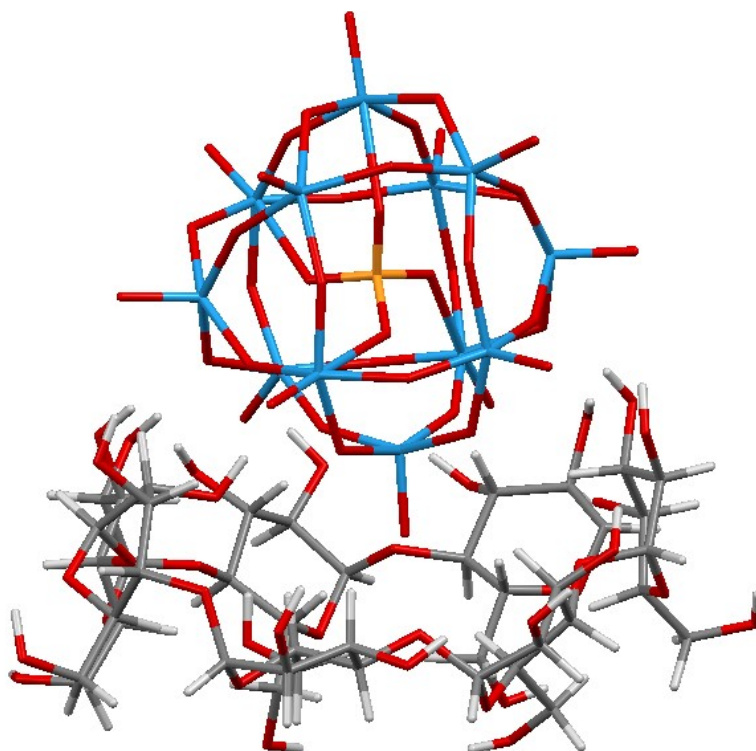

**Figure S2.** Representative structure of the  $\beta$ -CD-WPOM complex demonstrating favorable WPOM binding to the secondary face of  $\beta$ -CD. The structure was used as a standard structure for L-J parameter optimization. The calculated CCS of the structure is  $435.0 \text{ \AA}^2$ .

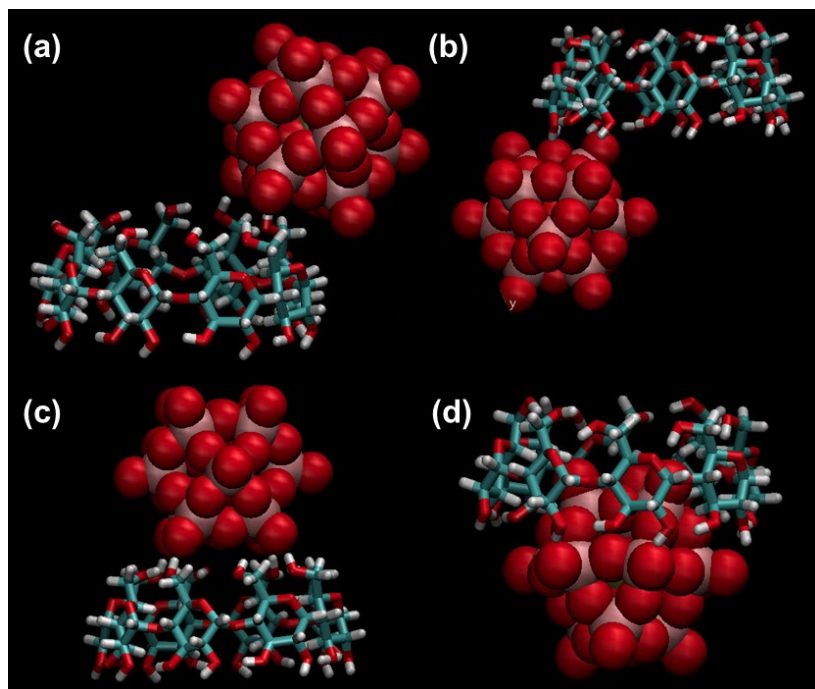

**Figure S3.** Four initial positions of WPOM (van der Waals representation) and  $\gamma$ -CD (“licorice” representation in VMD software) in MD simulations.  $\beta$ -CD used a similar set of initial positions.

**Table S2.** Calculated collision cross sections (CCSs) of the 52 low-energy structures of  $\gamma$ -CD-WPOM complex shown in Figure 3a (used to generate the histogram).

| Complex initial structure | .xyz File Name  | Calculated CCS ( $\text{\AA}^2$ ) |
|---------------------------|-----------------|-----------------------------------|
| Figure S3a                | GP-CD8-1-5600   | 451                               |
|                           | GP-CD8-1-6000   | 466.8                             |
|                           | GP-CD8-1-6400   | 456.5                             |
|                           | GP-CD8-1-6800   | 462.8                             |
|                           | GP-CD8-1-7200   | 465.6                             |
|                           | GP-CD8-1-7600   | 469.8                             |
|                           | GP-CD8-1-8000   | 468.6                             |
|                           | GP-CD8-1-8400   | 470.7                             |
|                           | GP-CD8-1-9200   | 468.8                             |
|                           | GP-CD8-1-9600   | 472.4                             |
|                           | GP-CD8-1-10000  | 461.7                             |
| Figure S3b                | GP-CD8-2-5600   | 449                               |
|                           | GP-CD8-2-6000   | 443.3                             |
|                           | GP-CD8-2-6400   | 446.5                             |
|                           | GP-CD8-2-6800   | 454.8                             |
|                           | GP-CD8-2-7200   | 450.9                             |
|                           | GP-CD8-2-7600   | 451.5                             |
|                           | GP-CD8-2-8000   | 474.5                             |
|                           | GP-CD8-2-8400   | 455.9                             |
|                           | GP-CD8-2-9200   | 466.4                             |
|                           | GP-CD8-2-9600   | 450.2                             |
|                           | GP-CD8-2-10000  | 457.4                             |
| Figure S3c                | GP-CD8-11-5600  | 469.2                             |
|                           | GP-CD8-11-6000  | 477.1                             |
|                           | GP-CD8-11-6400  | 484                               |
|                           | GP-CD8-11-6800  | 488.5                             |
|                           | GP-CD8-11-7200  | 471.9                             |
|                           | GP-CD8-11-7600  | 469.8                             |
|                           | GP-CD8-11-8000  | 468                               |
|                           | GP-CD8-11-8400  | 489.4                             |
|                           | GP-CD8-11-9200  | 468.2                             |
|                           | GP-CD8-11-9600  | 462.4                             |
|                           | GP-CD8-1-10000  | 481.8                             |
| Figure S3d                | GP-CD8-21-5600  | 456.4                             |
|                           | GP-CD8-21-6000  | 464.3                             |
|                           | GP-CD8-21-6400  | 456.8                             |
|                           | GP-CD8-21-6800  | 455.3                             |
|                           | GP-CD8-21-7200  | 468.7                             |
|                           | GP-CD8-21-7600  | 449.3                             |
|                           | GP-CD8-21-8000  | 463.5                             |
|                           | GP-CD8-21-8400  | 456.8                             |
|                           | GP-CD8-21-9200  | 460.8                             |
|                           | GP-CD8-21-9600  | 455.6                             |
|                           | GP-CD8-21-10000 | 460.9                             |



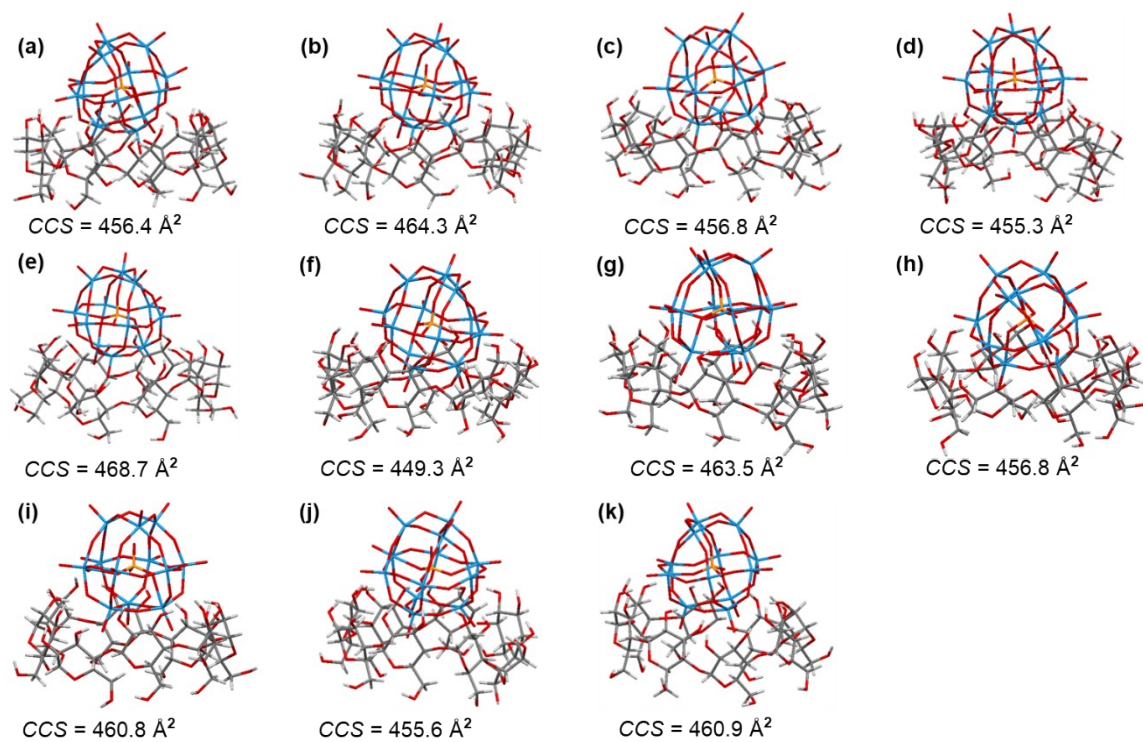

**Figure S4.** Structures and collision cross sections of  $\gamma$ -CD-WPOM complexes formed with secondary face of  $\gamma$ -CD, with Figure S3d as the initial structure. These structures are consecutive energy minima in a single simulated annealing experiment in MD simulation.

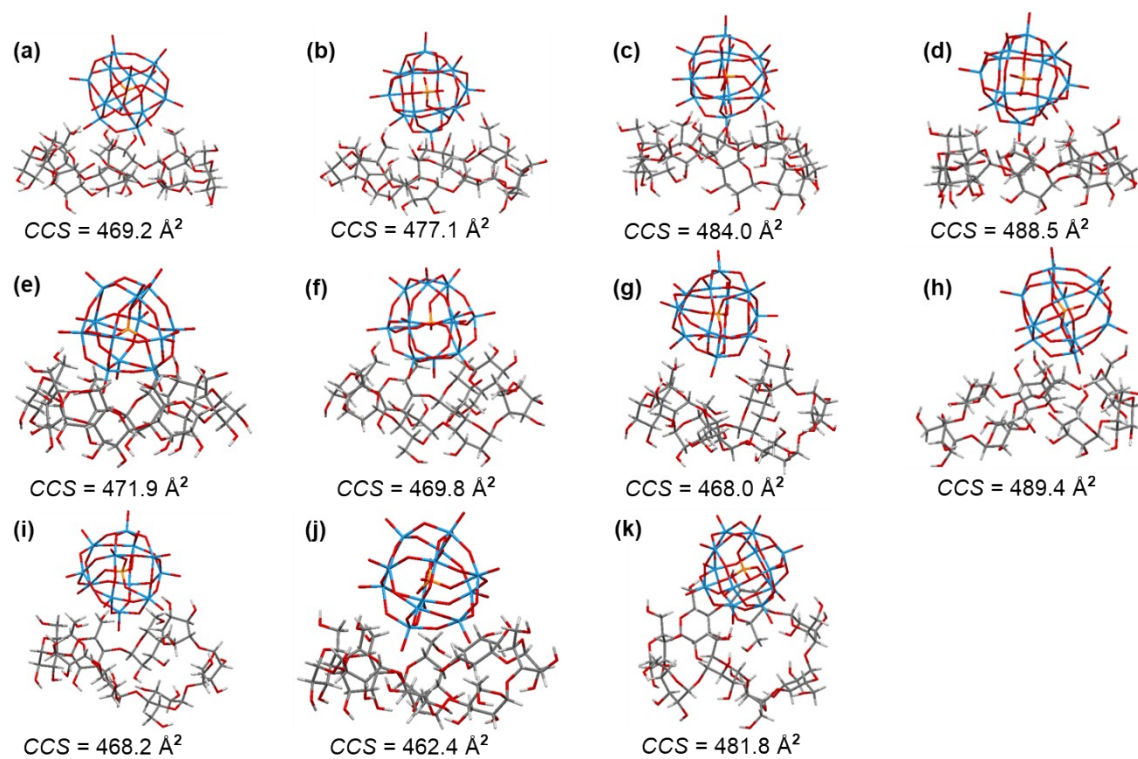

**Figure S5.** Structures and collision cross sections of  $\gamma$ -CD-WPOM complexes formed with primary face of  $\gamma$ -CD, with Figure S3c as the initial structure. These structures are consecutive energy minima in a single simulated annealing experiment in MD simulation.

(a) Calculated CCS: 455.9 Å<sup>2</sup>

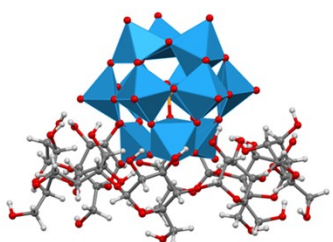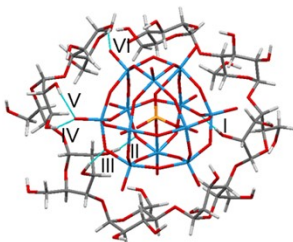

| H-Bond Number | Non-covalent bond length, Å | Donor-H-Acceptor Angle, ° |
|---------------|-----------------------------|---------------------------|
| I             | 1.75                        | 170.0                     |
| II            | 1.69                        | 165.9                     |
| III           | 1.95                        | 167.3                     |
| IV            | 1.95                        | 161.7                     |
| V             | 2.26                        | 167.0                     |
| VI            | 1.72                        | 152.8                     |

(b) Calculated CCS: 457.4 Å<sup>2</sup>

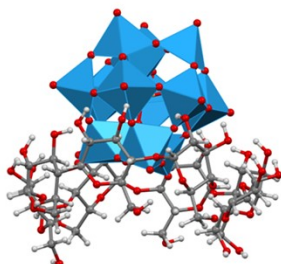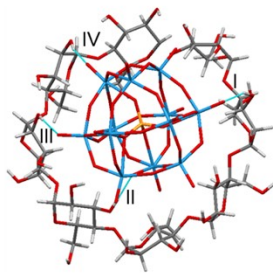

| H-Bond Number | Non-covalent bond length, Å | Donor-H-Acceptor Angle, ° |
|---------------|-----------------------------|---------------------------|
| I             | 1.97                        | 152.4                     |
| II            | 2.00                        | 171.5                     |
| III           | 1.90                        | 156.7                     |
| IV            | 2.26                        | 164.8                     |

(c) Calculated CCS: 471.9 Å<sup>2</sup>

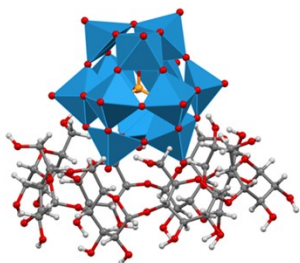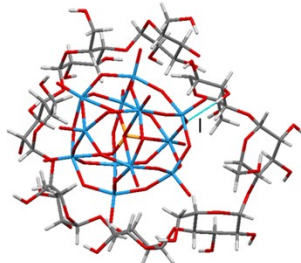

| H-Bond Number | Non-covalent bond length, Å | Donor-H-Acceptor Angle, ° |
|---------------|-----------------------------|---------------------------|
| I             | 2.31                        | 175.0                     |

(d) Calculated CCS: 469.8 Å<sup>2</sup>

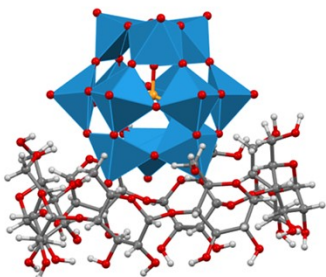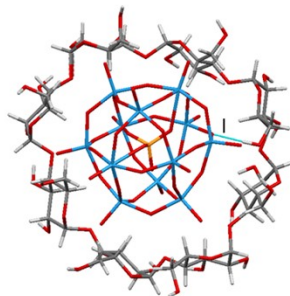

| H-Bond Number | Non-covalent bond length, Å | Donor-H-Acceptor Angle, ° |
|---------------|-----------------------------|---------------------------|
| I             | 2.01                        | 174.4                     |

**Figure S6.** Additional simulated structures of  $\gamma$ -CD–WPOM complexes formed using secondary surface (a, b) and primary surface (c, d) of  $\gamma$ -CD. The calculated CCSs together with tables of hydrogen bonding analysis are shown in the Figure. Each hydrogen bond shown in the tables are labeled with Roman numerals in the top view structure.

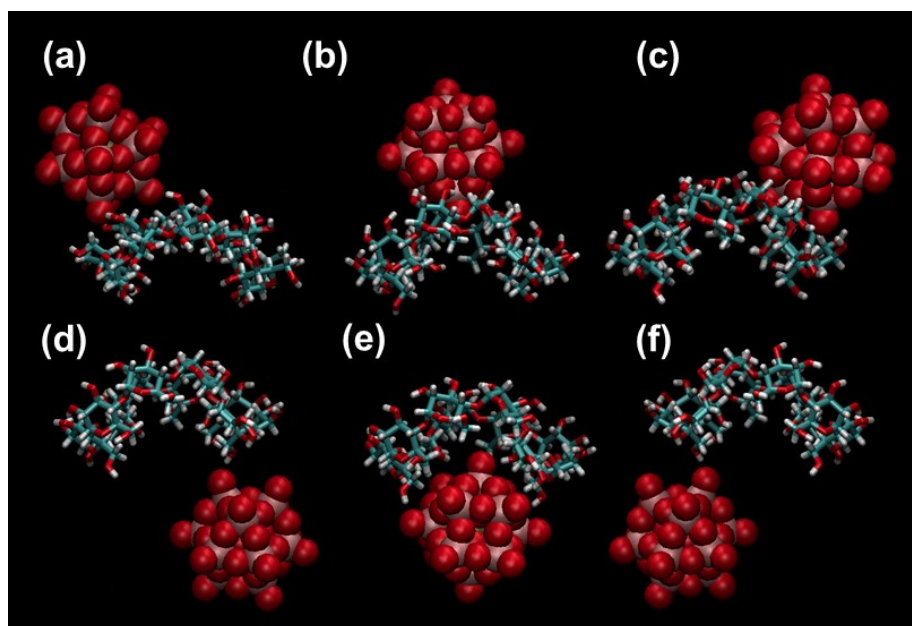

**Figure S7.** Six initial positions of WPOM (van der Waals representation) and  $\epsilon$ -CD (“licorice” representation in VMD software) in MD simulations.  $\zeta$ -CD used a similar set of initial positions.

**Table S3.** Calculated collision cross sections (CCSs) of the 66 low-energy structures of  $\epsilon$ -CD-WPOM complex.

| Complex initial structure | .xyz File Name | Calculated CCS ( $\text{\AA}^2$ ) |
|---------------------------|----------------|-----------------------------------|
| Figure S7a                | GP-CD10-1-5600 | 515.8                             |
|                           | GP-CD10-1-6000 | 512.9                             |
|                           | GP-CD10-1-6400 | 518.4                             |
|                           | GP-CD10-1-6800 | 529.6                             |
|                           | GP-CD10-1-7200 | 497                               |
|                           | GP-CD10-1-7600 | 496                               |
|                           | GP-CD10-1-8000 | 501.8                             |
|                           | GP-CD10-1-8400 | 493.4                             |
|                           | GP-CD10-1-9200 | 532.5                             |
|                           | GP-CD10-1-9600 | 506.7                             |
| GP-CD10-1-10000           | 490.8          |                                   |
| Figure S7b                | GP-CD10-2-5600 | 510.3                             |
|                           | GP-CD10-2-6000 | 512.5                             |
|                           | GP-CD10-2-6400 | 513.6                             |
|                           | GP-CD10-2-6800 | 504.1                             |
|                           | GP-CD10-2-7200 | 527.7                             |
|                           | GP-CD10-2-7600 | 522.3                             |
|                           | GP-CD10-2-8000 | 518.9                             |
|                           | GP-CD10-2-8400 | 518.8                             |
|                           | GP-CD10-2-9200 | 524.6                             |
|                           | GP-CD10-2-9600 | 512.5                             |
| GP-CD10-2-10000           | 510.9          |                                   |
| Figure S7c                | GP-CD10-3-5600 | 505.8                             |
|                           | GP-CD10-3-6000 | 505.6                             |
|                           | GP-CD10-3-6400 | 513.1                             |
|                           | GP-CD10-3-6800 | 510.3                             |
|                           | GP-CD10-3-7200 | 528.8                             |
|                           | GP-CD10-3-7600 | 519                               |
|                           | GP-CD10-3-8000 | 529.8                             |
|                           | GP-CD10-3-8400 | 539.7                             |
|                           | GP-CD10-3-9200 | 514.7                             |
|                           | GP-CD10-3-9600 | 523.6                             |
| GP-CD10-3-10000           | 512.2          |                                   |
| Figure S7d                | GP-CD10-4-5600 | 490.9                             |
|                           | GP-CD10-4-6000 | 495.2                             |
|                           | GP-CD10-4-6400 | 510.8                             |
|                           | GP-CD10-4-6800 | 505.7                             |
|                           | GP-CD10-4-7200 | 507.5                             |
|                           | GP-CD10-4-7600 | 513.7                             |
| GP-CD10-4-8000            | 493.8          |                                   |

|                  |                  |                 |
|------------------|------------------|-----------------|
|                  | GP-CD10-4-8400   | 508.3           |
|                  | GP-CD10-4-9200   | 514.5           |
|                  | GP-CD10-4-9600   | 521.2           |
|                  | GP-CD10-4-10000  | 515.4           |
| Figure S7e       | GP-CD10-11-5600  | 490.9           |
|                  | GP-CD10-11-6000  | 520.9           |
|                  | GP-CD10-11-6400  | 514.2           |
|                  | GP-CD10-11-6800  | 517             |
|                  | GP-CD10-11-7200  | 490.6           |
|                  | GP-CD10-11-7600  | 478             |
|                  | GP-CD10-11-8000  | 508.5           |
|                  | GP-CD10-11-8400  | 511.9           |
|                  | GP-CD10-11-9200  | 504.1           |
|                  | GP-CD10-11-9600  | 488             |
|                  | GP-CD10-11-10000 | 517.8           |
|                  | Figure S7f       | GP-CD10-31-5600 |
| GP-CD10-31-6000  |                  | 495.3           |
| GP-CD10-31-6400  |                  | 489.3           |
| GP-CD10-31-6800  |                  | 474             |
| GP-CD10-31-7200  |                  | 487.5           |
| GP-CD10-31-7600  |                  | 482.2           |
| GP-CD10-31-8000  |                  | 475.3           |
| GP-CD10-31-8400  |                  | 469.6           |
| GP-CD10-31-9200  |                  | 486.8           |
| GP-CD10-31-9600  |                  | 477.4           |
| GP-CD10-31-10000 |                  | 481.5           |

**Table S4.** Calculated collision cross sections (CCSs) of the 66 low-energy structures of  $\gamma$ -CD-WPOM complex.

| Complex initial structure | .xyz File Name  | Calculated CCS ( $\text{\AA}^2$ ) |
|---------------------------|-----------------|-----------------------------------|
| Figure S7a                | GP-CD11-1-5600  | 511.5                             |
|                           | GP-CD11-1-6000  | 512.8                             |
|                           | GP-CD11-1-6400  | 516.4                             |
|                           | GP-CD11-1-6800  | 518.2                             |
|                           | GP-CD11-1-7200  | 512.4                             |
|                           | GP-CD11-1-7600  | 512.4                             |
|                           | GP-CD11-1-8000  | 509.2                             |
|                           | GP-CD11-1-8400  | 516.9                             |
|                           | GP-CD11-1-9200  | 505.2                             |
|                           | GP-CD11-1-9600  | 507.2                             |
|                           | GP-CD11-1-10000 | 508.1                             |
| Figure S7b                | GP-CD11-2-5600  | 560.8                             |
|                           | GP-CD11-2-6000  | 557.5                             |
|                           | GP-CD11-2-6400  | 546.4                             |
|                           | GP-CD11-2-6800  | 536.1                             |
|                           | GP-CD11-2-7200  | 549.9                             |
|                           | GP-CD11-2-7600  | 533.5                             |
|                           | GP-CD11-2-8000  | 541.9                             |
|                           | GP-CD11-2-8400  | 547.8                             |
|                           | GP-CD11-2-9200  | 532.4                             |
|                           | GP-CD11-2-9600  | 555.3                             |
|                           | GP-CD11-2-10000 | 535.5                             |
| Figure S7c                | GP-CD11-3-5600  | 526                               |
|                           | GP-CD11-3-6000  | 510.7                             |
|                           | GP-CD11-3-6400  | 521.5                             |
|                           | GP-CD11-3-6800  | 524.6                             |
|                           | GP-CD11-3-7200  | 528.8                             |
|                           | GP-CD11-3-7600  | 522.4                             |
|                           | GP-CD11-3-8000  | 532.6                             |
|                           | GP-CD11-3-8400  | 537.1                             |
|                           | GP-CD11-3-9200  | 550.4                             |
|                           | GP-CD11-3-9600  | 531.2                             |
|                           | GP-CD11-3-10000 | 536                               |
| Figure S7d                | GP-CD11-4-5600  | 524.5                             |
|                           | GP-CD11-4-6000  | 537.1                             |
|                           | GP-CD11-4-6400  | 507.3                             |
|                           | GP-CD11-4-6800  | 519.7                             |
|                           | GP-CD11-4-7200  | 509.4                             |
|                           | GP-CD11-4-7600  | 514.4                             |
|                           | GP-CD11-4-8000  | 503.5                             |

|                  |                  |                 |
|------------------|------------------|-----------------|
|                  | GP-CD11-4-8400   | 517.2           |
|                  | GP-CD11-4-9200   | 483.7           |
|                  | GP-CD11-4-9600   | 527.7           |
|                  | GP-CD11-4-10000  | 503.7           |
| Figure S7e       | GP-CD11-11-5600  | 530.9           |
|                  | GP-CD11-11-6000  | 527.6           |
|                  | GP-CD11-11-6400  | 529.4           |
|                  | GP-CD11-11-6800  | 520.2           |
|                  | GP-CD11-11-7200  | 506.3           |
|                  | GP-CD11-11-7600  | 510.1           |
|                  | GP-CD11-11-8000  | 511.9           |
|                  | GP-CD11-11-8400  | 527             |
|                  | GP-CD11-11-9200  | 499.5           |
|                  | GP-CD11-11-9600  | 511.8           |
|                  | GP-CD11-11-10000 | 526.2           |
|                  | Figure S7f       | GP-CD11-31-5600 |
| GP-CD11-31-6000  |                  | 509.8           |
| GP-CD11-31-6400  |                  | 504.8           |
| GP-CD11-31-6800  |                  | 505.2           |
| GP-CD11-31-7200  |                  | 529             |
| GP-CD11-31-7600  |                  | 526.4           |
| GP-CD11-31-8000  |                  | 536.2           |
| GP-CD11-31-8400  |                  | 541.3           |
| GP-CD11-31-9200  |                  | 528.7           |
| GP-CD11-31-9600  |                  | 524.4           |
| GP-CD11-31-10000 | 526.9            |                 |



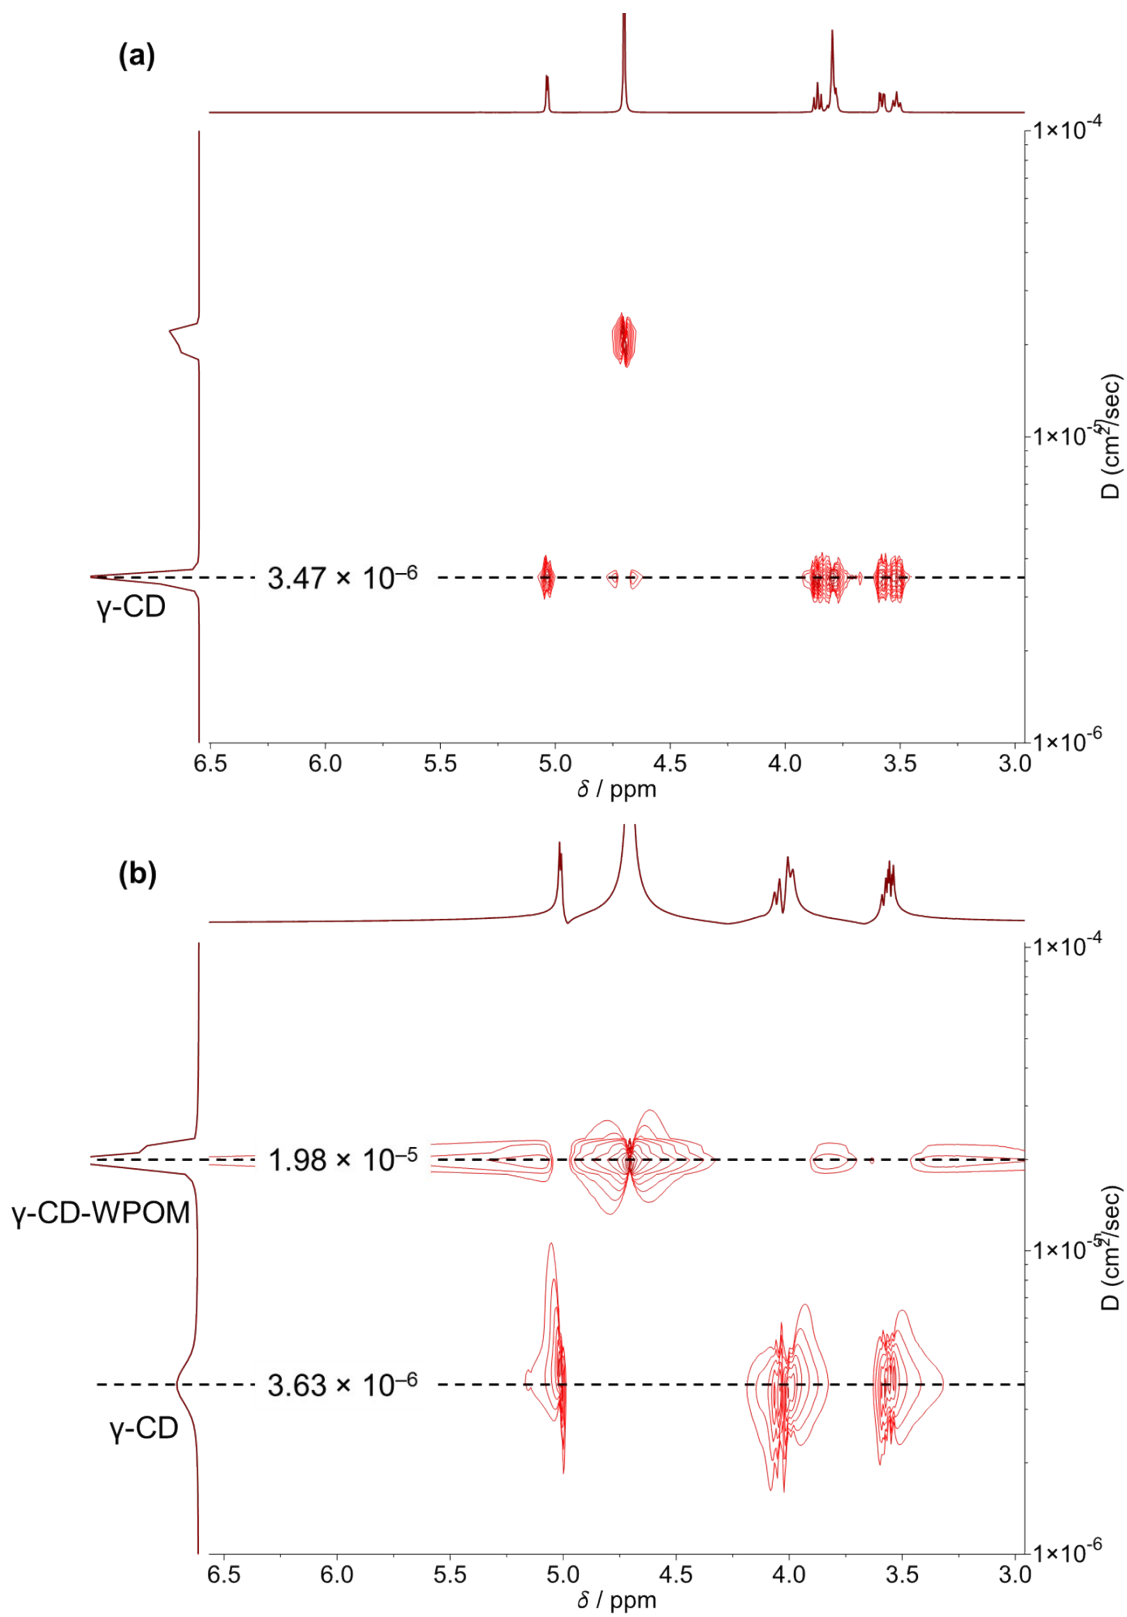

**Figure S8.** DOSY Spectra of a 10 mM  $\gamma$ -CD D<sub>2</sub>O solution before (a) and after (b) the addition of 20 mM WPOM.

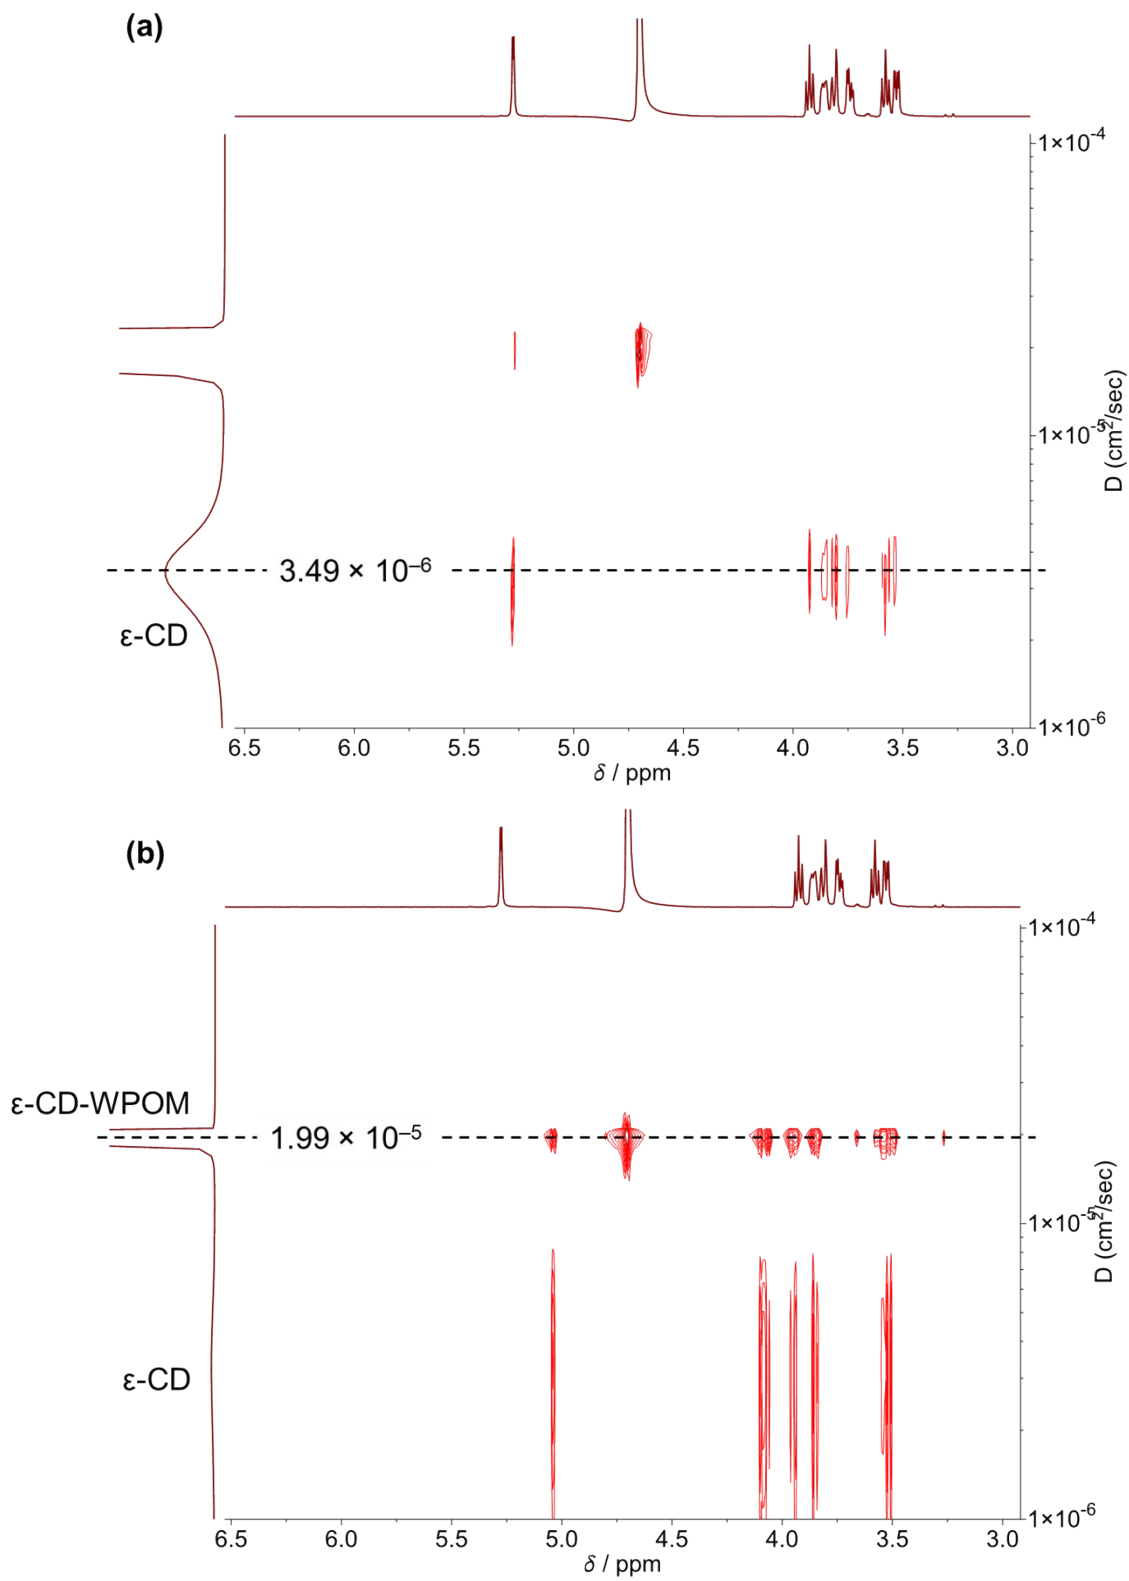

**Figure S9.** DOSY Spectra of a 10 mM  $\epsilon$ -CD  $D_2O$  solution before (a) and after (b) the addition of 20 mM WPOM.

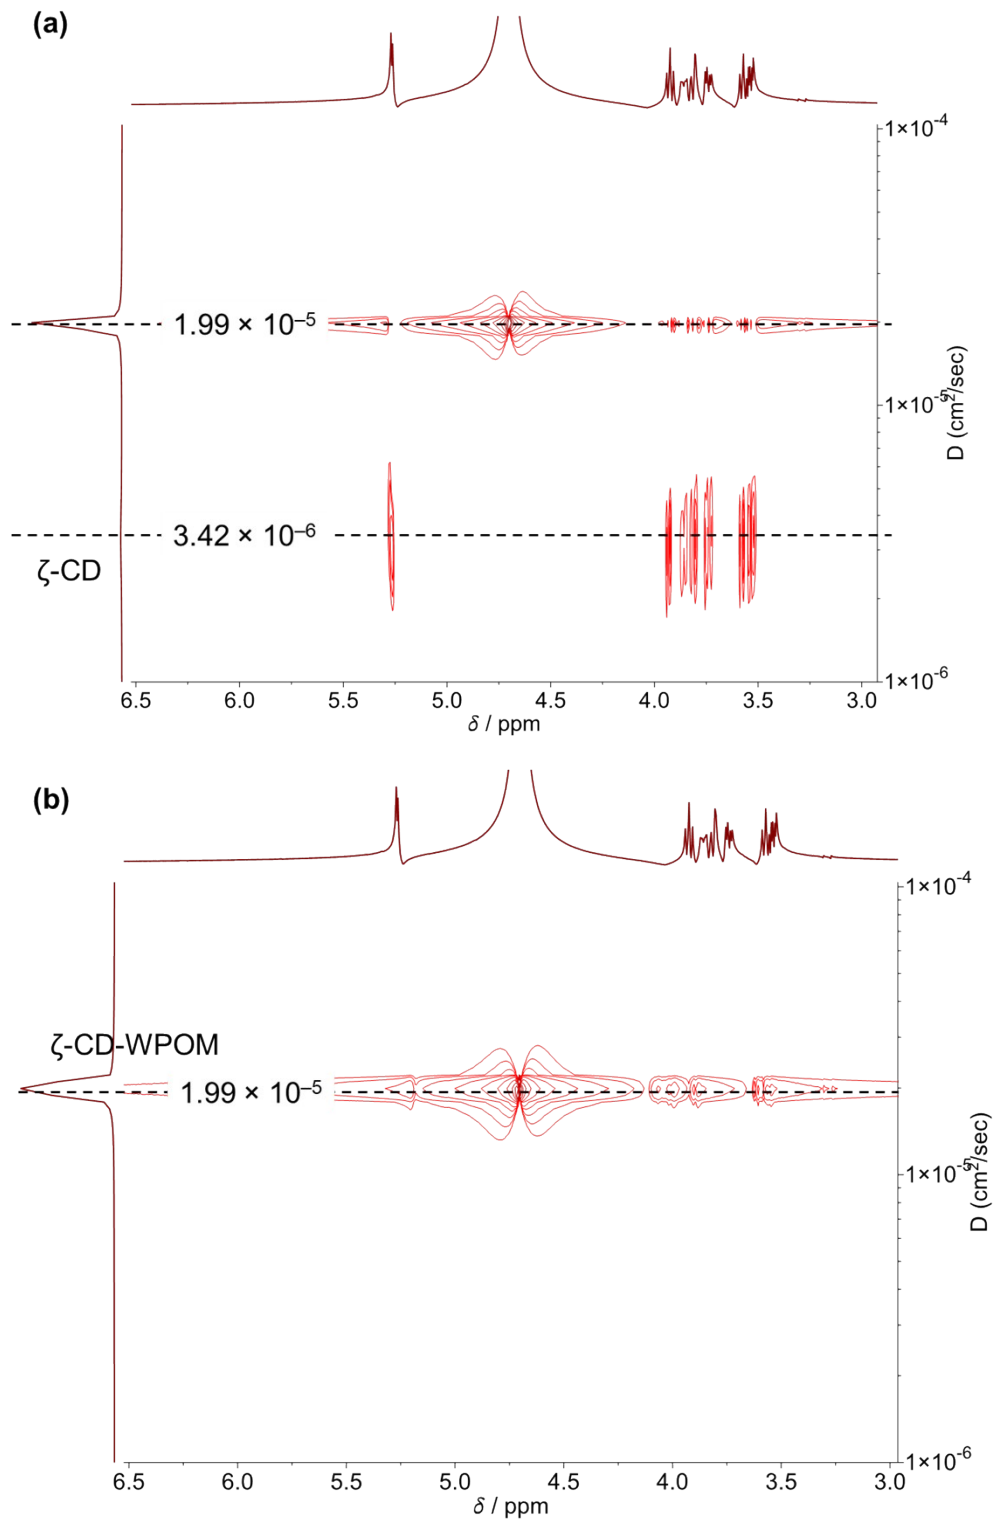

**Figure S10.** DOSY Spectra of a 10 mM  $\zeta$ -CD  $D_2O$  before (a) and after the addition of 20 mM WPOM (b). The peak at diffusion coefficient of  $1.99 \times 10^{-5} cm^2/s$  in (a) is attributed to contamination of WPOM in the  $\zeta$ -CD solution.

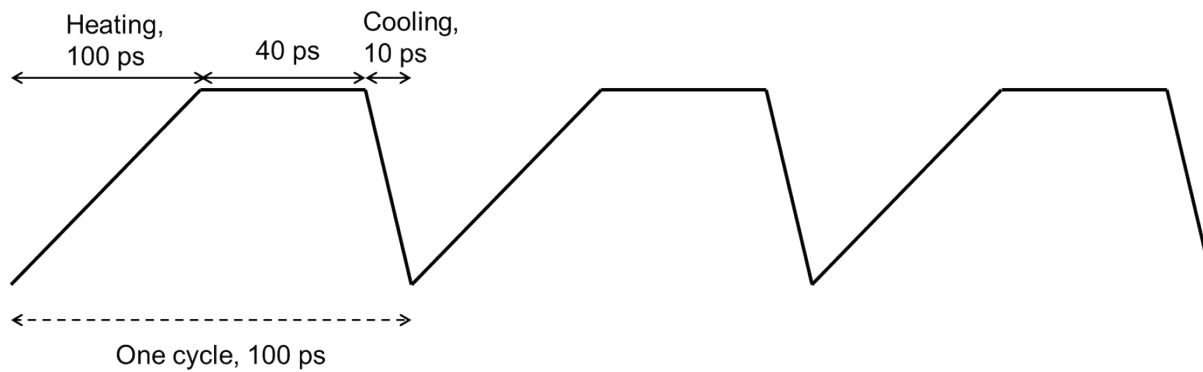

**Figure S11.** Heating and cooling program used in simulated annealing of CD–WPOM complexes.

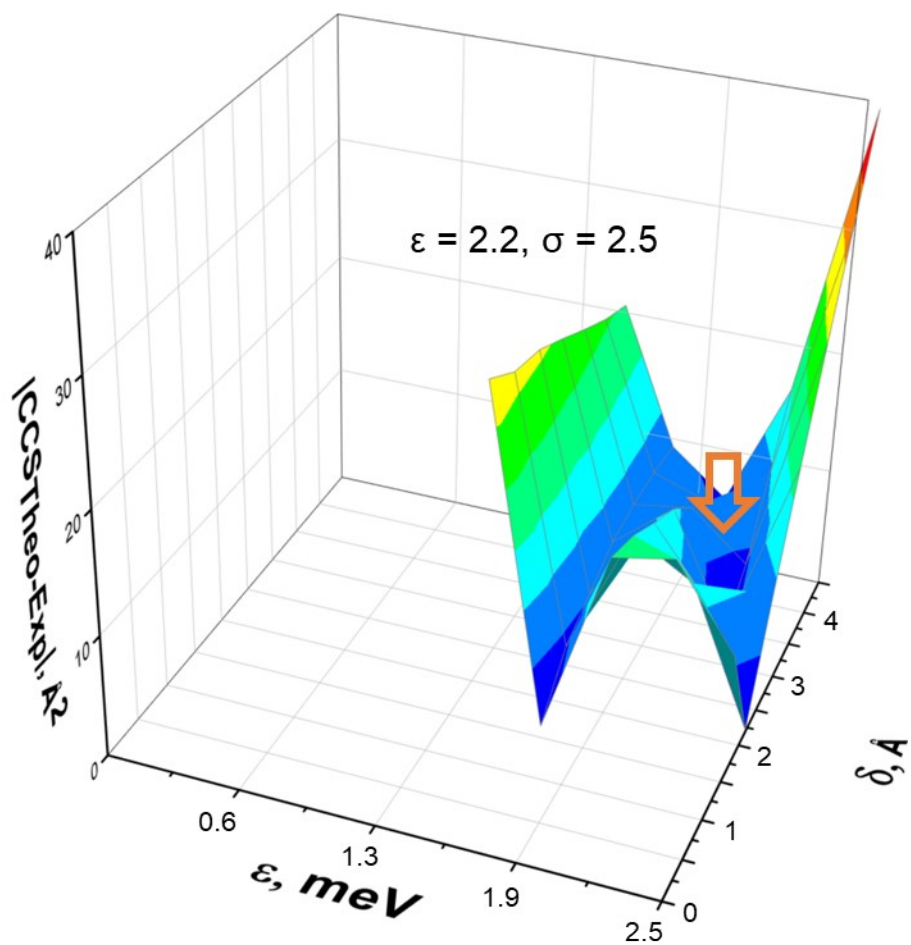

**Figure S12.** Mapped optimization surface for L-J parameters ( $\epsilon$  and  $\sigma$ ) for oxygen plotted using deviation of calculated CCSs from experimental CCS of the  $\beta$ -CD–WPOM complex shown in Figure 2.

## ■ REFERENCES

- (1) Prabhakaran, V.; Lang, Z.; Clotet, A.; Poblet, J. M.; Johnson, G. E.; Laskin, J. Controlling the Activity and Stability of Electrochemical Interfaces Using Atom-by-Atom Metal Substitution of Redox Species. *ACS Nano* **2019**, *13*, 458–466. López, X.; Nieto-Draghi, C.; Bo, C.; Avalos, J. B.; Poblet, J. M. Polyoxometalates in Solution: Molecular Dynamics Simulations on the  $\alpha$ -PW<sub>12</sub>O<sub>40</sub><sup>3-</sup> Keggin Anion in Aqueous Media. *J. Phys. Chem. A* **2005**, *109*, 1216–1222.
- (2) Kirschner, K. N.; Yongye, A. B.; Tschampel, S. M.; González-Outeiriño, J.; Daniels, C. R.; Foley, B. L.; Woods, R. J. GLYCAM06: A generalizable biomolecular force field. *Carbohydrates. J. Comput. Chem.* **2008**, *29*, 622-655.
- (3) Campuzano, I.; Bush, M. F.; Robinson, C. V.; Beaumont, C.; Richardson, K.; Kim, H.; Kim, H. I. Structural Characterization of Drug-like Compounds by Ion Mobility Mass Spectrometry: Comparison of Theoretical and Experimentally Derived Nitrogen Collision Cross Sections. *Anal. Chem.* **2012**, *84*, 1026-1033.
- (4) Hupin, S.; Tognetti, V.; Rosu, F.; Renaudineau, S.; Proust, A.; Izzet, G.; Gabelica, V.; Afonso, C.; Lavanant, H. Lennard-Jones Interaction Parameters of Mo and W in He and N<sub>2</sub> from Collision Cross-Sections of Lindqvist and Keggin Polyoxometalate Anions. *Phys. Chem. Chem. Phys.* **2022**, *24*, 16156–16166.
